# Supplementary material
Source: PubMed Central journal article supplement (PMC5971555)
Supplement: JCM.00002-18_zjm999095948s1.pdf [file JCM.00002-18_zjm999095948s1.pdf]

**Supplementary table 1: Description of the 25 excluded patients**

| Exclusion criteria                                                                                 | Number of patients<br>(%) | Sampling type            | Positive PCR | Commentary                                                   |
|----------------------------------------------------------------------------------------------------|---------------------------|--------------------------|--------------|--------------------------------------------------------------|
| No identified underlying condition                                                                 | 8 (32%)                   | BAL, n=5                 | 2            | Treated for nocardiosis, n=2                                 |
|                                                                                                    |                           | Sputum, n=1              | 1            | Treated for nocardiosis                                      |
|                                                                                                    |                           | Lung biopsy, n=1         | 1            | Not treated                                                  |
|                                                                                                    |                           | CSF, n=1                 | 0            | Lost to follow up                                            |
| No proven alternative diagnosis or improvement at 6 months without anti- <i>Nocardia</i> treatment | 9 (36%)                   | BAL, n=7                 | 1            | *                                                            |
|                                                                                                    |                           | CSF, n=2                 | 1†           | Received effective antibiotics against <i>Nocardia</i> , n=2 |
| No clinical or radiological signs compatible with nocardiosis                                      | 4 (16%)                   | Sinus, n=1               | 0            | Not treated                                                  |
|                                                                                                    |                           | CSF, n=3                 | 1‡           | Not treated                                                  |
| No <i>Nocardia</i> PCR on sample and positive culture                                              | 4 (16%)                   | Cutaneous biopsy         | NA           | <i>Nocardia wallacei</i>                                     |
|                                                                                                    |                           | Sputum                   |              | <i>Nocardia wallacei</i> (not treated)                       |
|                                                                                                    |                           | Pleural puncture         |              | <i>Nocardia cyriacigeorgica</i>                              |
|                                                                                                    |                           | Protected specimen brush |              | <i>Nocardia nova</i>                                         |

**Note:** BAL, bronchoalveolar lavage fluid; CSF, cerebrospinal fluid; NA, not available

\* One of these patients had positive PCR on the blood sample. The PCR was negative on BAL. The diagnosis of nocardiosis was not retained.

† Man, 46 year-old, HIV positive, cerebral abscess, treated as cerebral toxoplasmosis (serology positive) with pyrimethamine/sulfadiazine (treatment duration =7 weeks) then pyrimethamine/clindamycin, 3 lumbar puncture, 3 *Nocardia* PCR, 1<sup>st</sup> PCR positive out of 3

‡ Man, 57 year-old, HIV positive, no clinical or radiological (MRI) signs of nocardiosis, lumbar puncture without meningitis, *Nocardia* PCR positive; patient treated with trimethoprim-sulfamethoxazole for documented pneumocystosis pneumonia (treatment duration =3 weeks), no PCR in bronchoalveolar lavage

**Supplementary table 2: Microbiological workup among the negative control group (N=47)**

| Microbiological analysis                                                                                                            | N (%)     |
|-------------------------------------------------------------------------------------------------------------------------------------|-----------|
| BAL or bronchial aspirate                                                                                                           | 37 (78.7) |
| Respiratory virus PCR                                                                                                               | 23 (48.9) |
| Mycobacterial culture                                                                                                               | 34 (72.3) |
| Lung biopsies                                                                                                                       | 3 (6.3)   |
| Sputum without BAL                                                                                                                  | 3 (6.3)   |
| Non-invasive tests                                                                                                                  |           |
| Galactomannan antigen                                                                                                               | 24 (51)   |
| <i>Aspergillus fumigatus</i> PCR                                                                                                    | 7 (14.8)  |
| $\beta$ -D-glucan                                                                                                                   | 20 (42.7) |
| Urinary pneumococcal or <i>Legionella</i> antigen detection (Binax-NOW®)                                                            | 13 (27.6) |
| <i>Cryptococcus</i> antigen in plasma                                                                                               | 11 (23.4) |
| Pharyngeal sample for respiratory virus PCR                                                                                         | 6 (12.7)  |
| Pharyngeal sample for <i>Chlamydia</i> and <i>Mycoplasma pneumoniae</i> PCR                                                         | 1 (2.1)   |
| Cytomegalovirus PCR on blood                                                                                                        | 5 (10.6)  |
| <i>Toxoplasma</i> PCR on blood                                                                                                      | 2 (4.2)   |
| Tuberculosis Interferon-Gamma Release Assays                                                                                        | 2 (4.2)   |
| <b>Note:</b> BAL, bronchoalveolar lavage fluid                                                                                      |           |
| <b>Of note, 8 patients out of 47 had bacteriological samples cultured for less than two weeks (one of them with a positive PCR)</b> |           |
